# Supplementary material for: Pathological expression of tissue factor confers promising antitumor response to a novel therapeutic antibody SC1 in triple negative breast cancer and pancreatic adenocarcinoma
Source: PubMed Central journal article supplement (PMC5601716; doi:10.18632/oncotarget.19175), 2017-07-10
Supplement: oncotarget-08-59086-s001.pdf [file oncotarget-08-59086-s001.pdf]

## Pathological expression of tissue factor confers promising antitumor response to a novel therapeutic antibody SC1 in triple negative breast cancer and pancreatic adenocarcinoma

### SUPPLEMENTARY MATERIALS

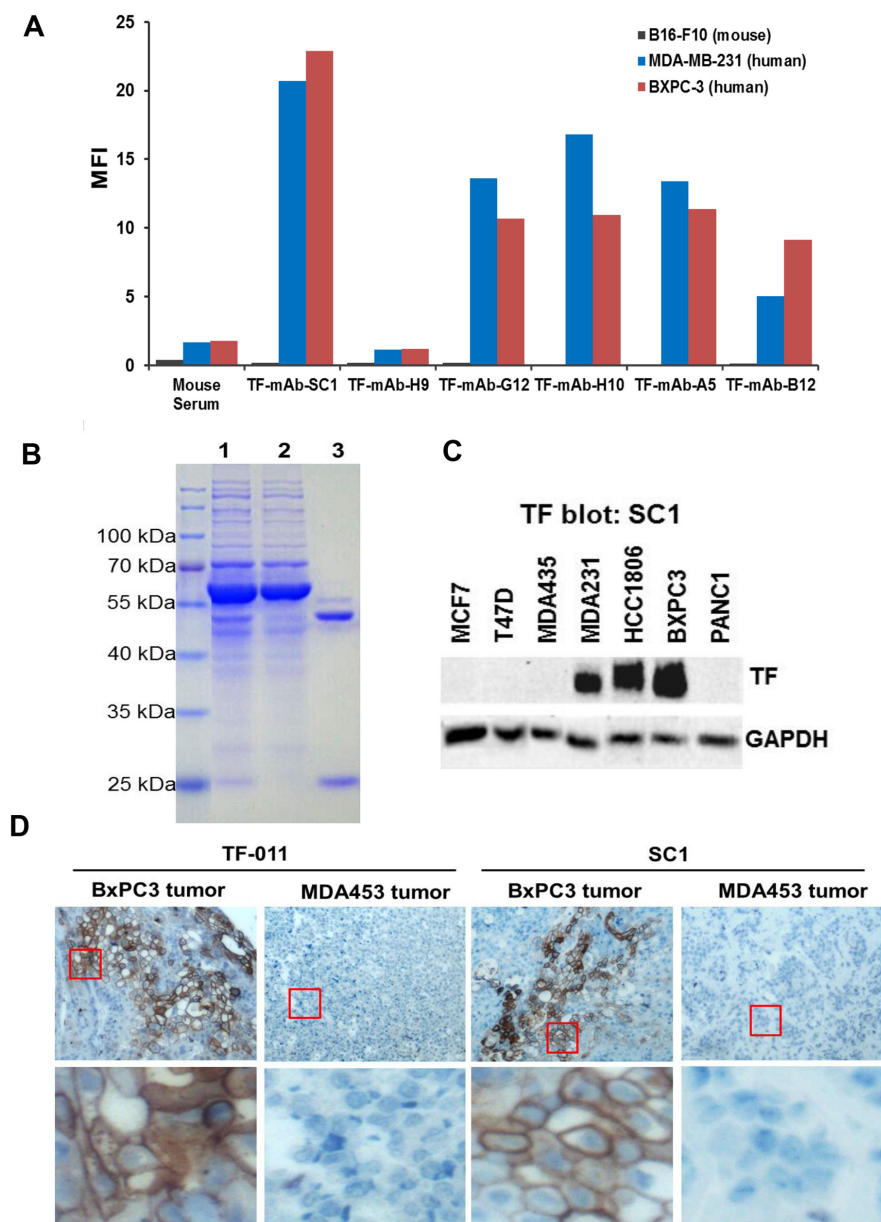

**Supplementary Figure 1: Identification and cloning of a novel anti-TF mAb SC1.** (A) A panel of originally identified TF mAbs were prepared from mouse ascites and assayed for binding to cell surface human TF in MDA-MB-231 and BxPC3 cells or mouse TF in B16-F10 cells by FACS analysis. The B16-F10 has been verified to express mouse TF (not shown). The binding activities (mean fluorescence intensity, MFI) at a constant 10  $\mu\text{g}/\text{mL}$  are plotted. (B) SDS-PAGE was run to show the ascites (lane-1), Protein-G column flow-through (lane-2) and the purified TF-mAb SC1 (lane-3). (C) The indicated TF-positive and TF-negative cell lines were immunoblotted with SC1. (D) Nude mouse xenograft tumors of BxPC3 (TF-high) or MDA-MB-453 (TF-low) were collected and subjected to immunostainings with 2  $\mu\text{g}/\text{mL}$  TF-011 or SC1 as described in Method. TF-011 and SC1 show very similar staining pattern with the strongest binding to surface of tumor cells.

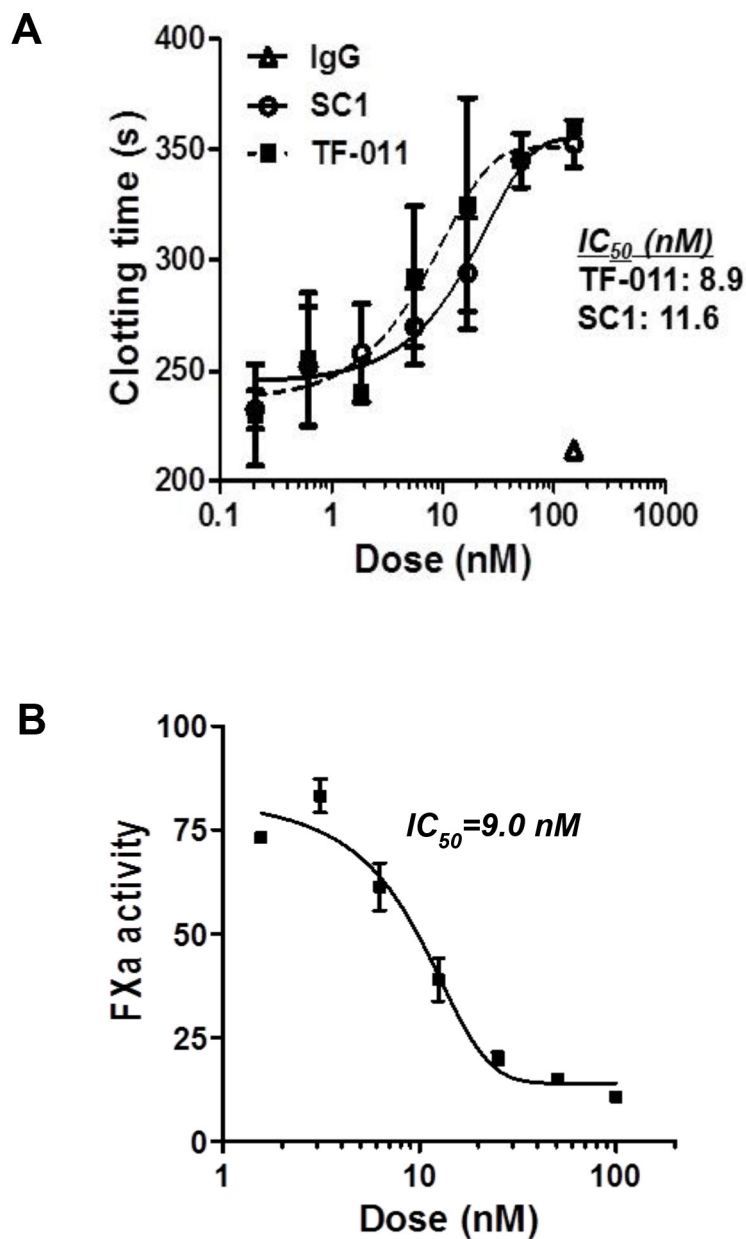

**Supplementary Figure 2: SC1 and TF-011 inhibit tumor-TF-induced coagulation.** The inhibition assays for clotting (A) and FXa generation (B) were performed with BxPC3 cells similarly as in Figure 3E, 3F. The TF-011 VL/VH regions were prepared as described [49].

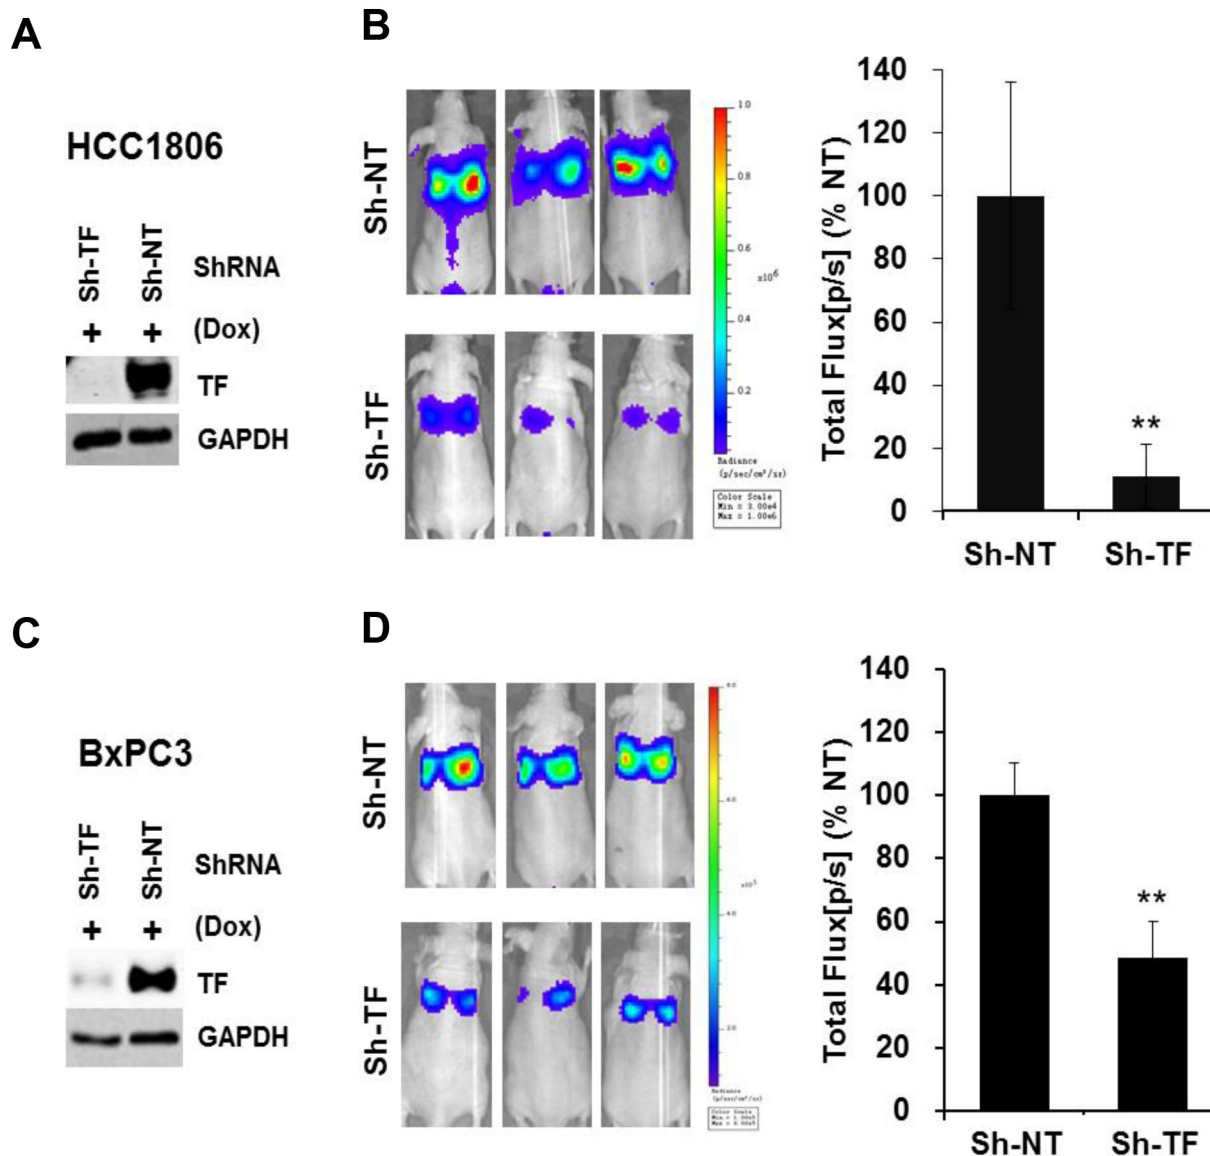

**Supplementary Figure 3: Depletion of TF in TNBC HCC1806 and PaC BxPC3 cells reduces lung metastasis capacity.** (A) Luciferase-tagged HCC1806 cells expressing the indicated pTRIPZ-ShRNAs were induced with doxycycline for 7 days and subjected to immunoblotting. (B) Cells as in (A) were injected into the tail vein of Balb/c nude mice (n=4). Bioluminescence was measured 4 h later (left panel) and quantified (right panel). (C) Luciferase-tagged BxPC3 cells expressing the indicated pTRIPZ-ShRNAs were similarly induced for TF depletion. (D) Cell as in (C) were injected into the tail vein of Balb/c nude mice (n=4). Bioluminescence was measured 4 h later (left panel) and quantified (right panel). \*\*, P<0.01.

**A**

| SC1-MMAE  |                       |
|-----------|-----------------------|
| Cell line | IC <sub>50</sub> (nM) |
| MDA453    | >100                  |
| MCF7      | >100                  |
| T47D      | >100                  |
| A549      | >100                  |
| H1975     | 0.549±0.065           |
| U87MG     | 32.491±5.362          |
| MDA231    | 0.112±0.014           |
| HCC1806   | 0.088±0.01            |
| BxPC3     | 0.049±0.003           |

**B**

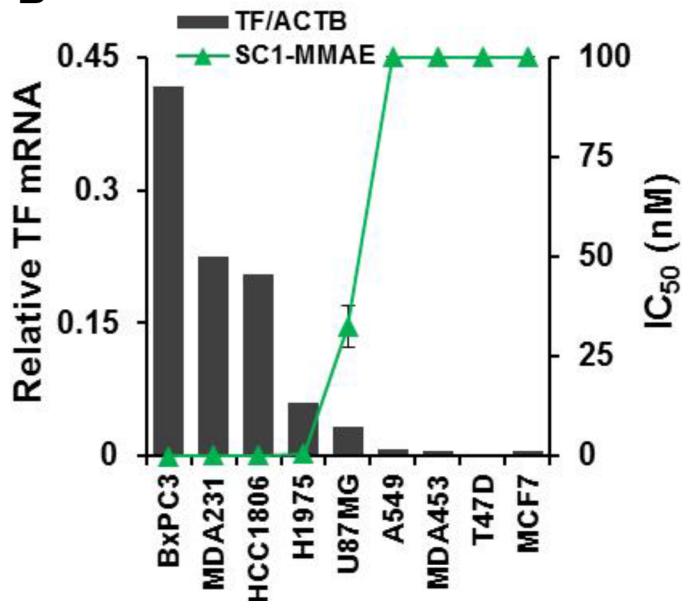

**C**

| SC1-DM1   |                       |
|-----------|-----------------------|
| Cell line | IC <sub>50</sub> (nM) |
| MDA453    | >100                  |
| MCF7      | 100                   |
| T47D      | >100                  |
| A549      | >100                  |
| H1975     | 25.395±4.482          |
| U87MG     | 17.203±0.928          |
| MDA231    | 0.098±0.025           |
| HCC1806   | 0.022±0.006           |
| BxPC3     | 0.038±0.005           |
| Hs578T    | 0.074±0.009           |

**D**

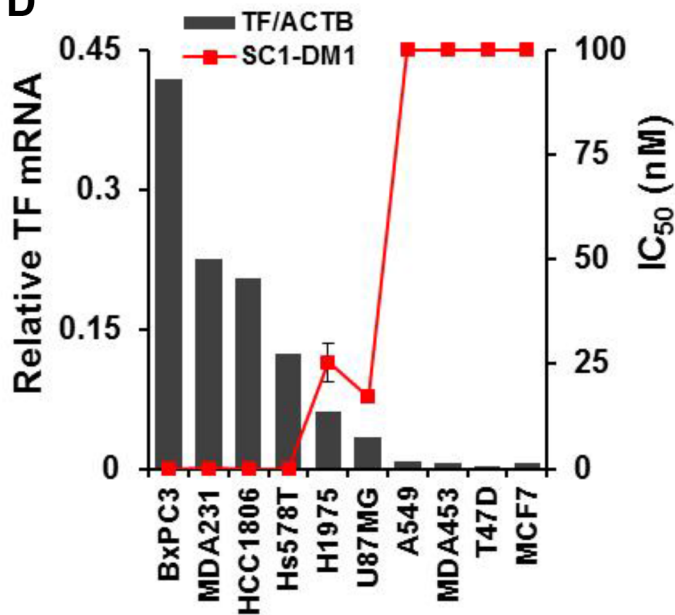

**Supplementary Figure 4: SC1-ADCs show potent and specific cytotoxicity in TF-overexpressing tumor cells.** (A) The indicated cell lines were treated with various doses of SC1-MMAE for 4 days and IC<sub>50</sub> values are shown. (B) Co-plot of SC1-MMAE IC<sub>50</sub> with relative TF-mRNA expression level (36). (C) The same set of cell lines were treated with SC1-DM1 for 4 days and IC<sub>50</sub> values are shown. (D) Co-plot of SC1-DM1 IC<sub>50</sub> with TF-mRNA level as in B.

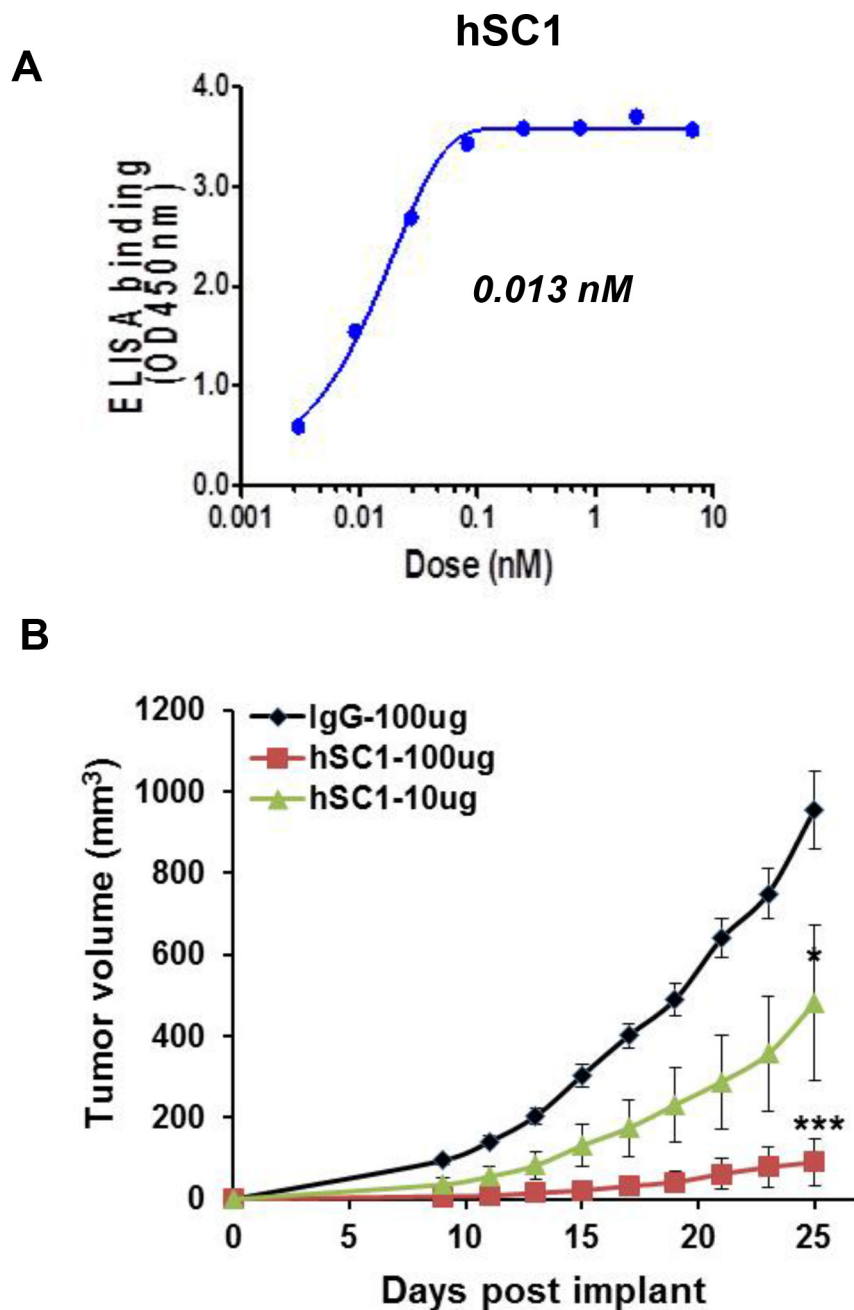

**Supplementary Figure 5: Binding affinity profile of the humanized SC1 (hSC1).** (A) Binding activity of hSC1 to TF-ECD was assessed by ELISA with  $EC_{50}$  value indicated. (B) HCC1806 cells were pre-mixed with the indicated doses of hSC1 or IgG and were implanted into MFP (n=10) in nude mice. Tumor growth curves are shown. \*,  $P < 0.05$ ; \*\*\*,  $P < 0.001$ .
